# Supplementary material for: Holiday Spikes in Pneumococcal Disease among Older Adults
Source: Atypon-hosted journal article supplement (doi:10.1056/nejmc0904844), 2009-12-23
Supplement: nejm_walter_2584sa1.pdf [file nejm_walter_2584sa1.pdf]

## Supplementary Appendix

This appendix has been provided by the authors to give readers additional information about their work.

Supplement to: Walter ND, Taylor TH Jr, Dowell SF, Mathis S, Moore MR. Holiday spikes in pneumococcal disease among older adults. *N Engl J Med* 2009;361:2584-5.

**Table 1. Age distribution of persons with invasive pneumococcal disease during non-spike and spike periods.**

| Age, years | Pre-vaccine period <sup>a</sup>           |                             |                                       |                             |                         | Post-vaccine period <sup>b</sup>          |                             |                                     |                             |                         |
|------------|-------------------------------------------|-----------------------------|---------------------------------------|-----------------------------|-------------------------|-------------------------------------------|-----------------------------|-------------------------------------|-----------------------------|-------------------------|
|            | Non-spike cases <sup>c</sup><br>(n=3,446) |                             | Spike cases <sup>d</sup><br>(n=1,600) |                             | Odds ratio,<br>(95% CI) | Non-spike cases <sup>c</sup><br>(n=3,855) |                             | Spike cases <sup>d</sup><br>(n=179) |                             | Odds ratio,<br>(95% CI) |
|            | No. of cases                              | % annual cases <sup>e</sup> | No. of cases                          | % annual cases <sup>e</sup> |                         | No. of cases                              | % annual cases <sup>e</sup> | No. of cases                        | % annual cases <sup>e</sup> |                         |
| <5         | 799                                       | 76.6                        | 244                                   | 23.4                        | Ref                     | 383                                       | 96.2                        | 15                                  | 3.8                         | Ref                     |
| 5-17       | 108                                       | 73.4                        | 36                                    | 26.5                        | 1.18 (.80-1.75)         | 124                                       | 95.4                        | 6                                   | 4.6                         | 1.24 (0.47-3.25)        |
| 18-34      | 346                                       | 70.9                        | 142                                   | 29.1                        | 1.34 (1.05-1.71)        | 241                                       | 95.6                        | 11                                  | 4.4                         | 1.17 (0.53-2.58)        |
| 35-49      | 702                                       | 70.1                        | 300                                   | 29.9                        | 1.40 (1.15-1.70)        | 817                                       | 95.4                        | 39                                  | 4.6                         | 1.22 (.66-2.24)         |
| 50-64      | 483                                       | 64.3                        | 268                                   | 35.7                        | 1.82 (1.48-2.23)        | 885                                       | 96.2                        | 35                                  | 3.8                         | 1.01 (0.55-1.87)        |
| 65-79      | 555                                       | 62.4                        | 335                                   | 37.6                        | 1.98 (1.62-2.41)        | 772                                       | 94.6                        | 44                                  | 5.4                         | 1.46 (0.80-2.65)        |
| 80+        | 453                                       | 62.5                        | 272                                   | 37.5                        | 1.97 (1.60-2.42)        | 633                                       | 95.6                        | 29                                  | 4.4                         | 1.17 (0.62-2.21)        |

<sup>a</sup> Pre-vaccine period: July 1, 1995 – June 30, 2000.

<sup>b</sup> Post-vaccine period: July 1, 2001 – June 30, 2006.

<sup>c</sup> Cases of invasive pneumococcal disease occurring during non-spike periods. Non-spike periods were days in December and January not included in spike periods.

<sup>d</sup> Cases of invasive pneumococcal disease occurring during spike periods. Spike periods were days in which the 5-day simple moving average of daily rates exceeded the 95% CI surrounding the expected seasonal baseline for  $\geq 5$  consecutive days.

<sup>e</sup> Percentage of total annual cases in each age group which occurred in non-spike and spike periods.
